# Supplementary material for: Association of multimorbidity and changes in health-related quality of life following myocardial infarction: a UK multicentre longitudinal patient-reported outcomes study
Source: Springer Nature journal article supplement (doi:10.1186/s12916-021-02098-y), 2021-09-28
Supplement: MOESM1 [file 19706234]

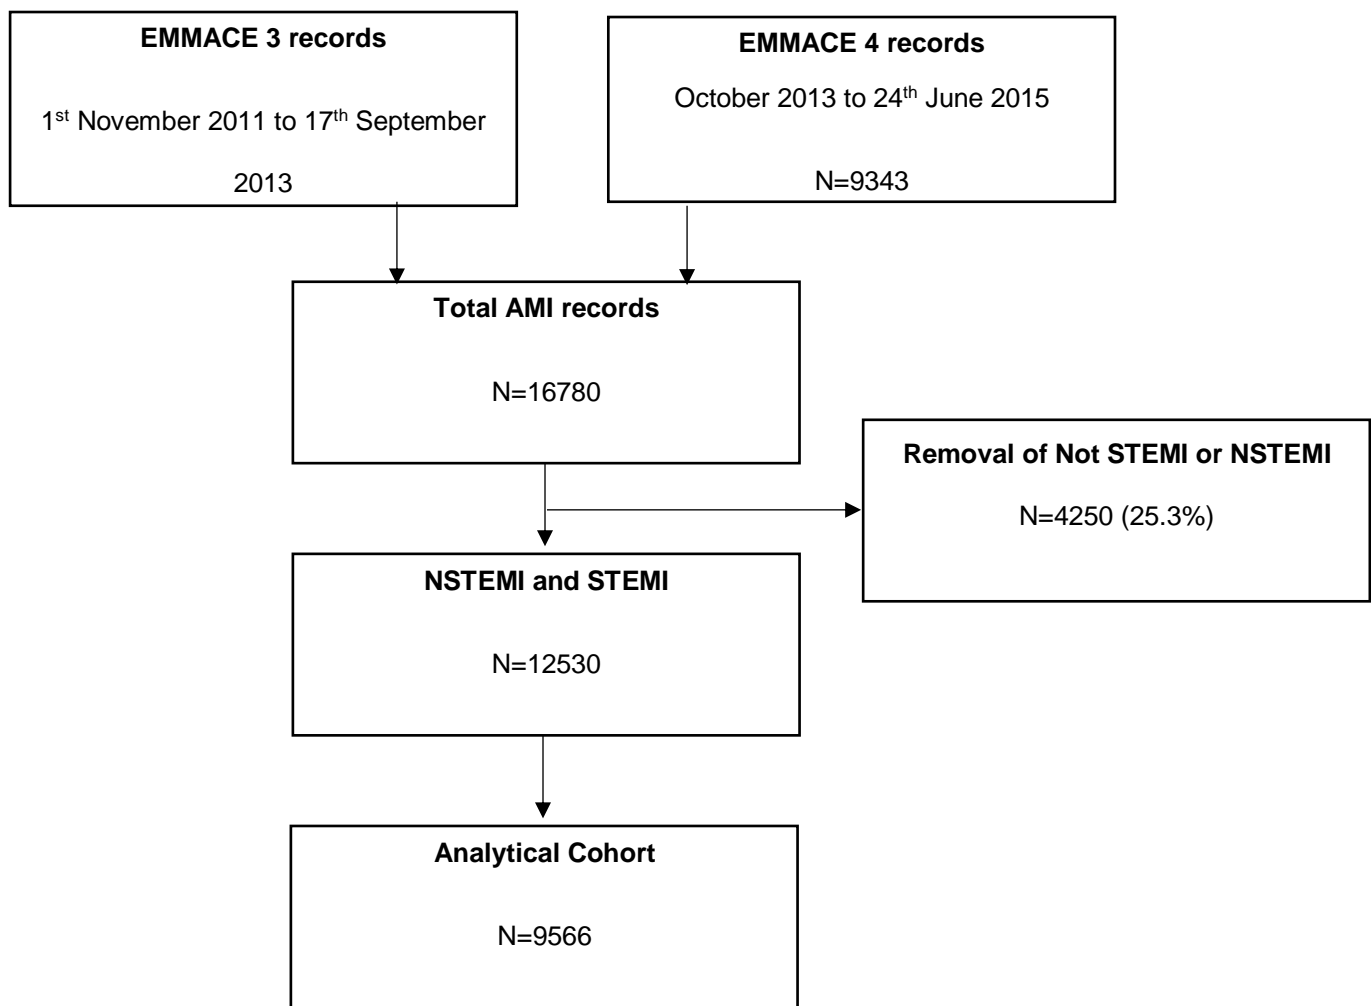

**Figure S1: Number of patients who enrolled in EMMACE 3 and 4.**

**Table S1: latent class analysis model selection goodness of fit statistics**

|           | AIC      | ssBIC    | BLRT p value | Entropy |
|-----------|----------|----------|--------------|---------|
| 1 class   | 39085.29 | 39113.11 |              |         |
| 2 classes | 38037    | 38096.65 | <0.001       | 0.49    |
| 3 classes | 37989.26 | 38080.67 | <0.001       | 0.54    |
| 4 classes | 37988.43 | 38111.65 | 0.19         | 0.70    |
| 5 classes | 37990.24 | 38145.24 | 0.39         | 0.74    |

**Table S2: Proportions of latent class based on their most likely latent class membership**

| Final class counts and proportions for the latent class based on their most likely latent class membership |      |         | Average Latent Class Probabilities for Most Likely Latent Class Membership (Row) by Latent Class (Column) |              |              |              |
|------------------------------------------------------------------------------------------------------------|------|---------|-----------------------------------------------------------------------------------------------------------|--------------|--------------|--------------|
| Latent Classes                                                                                             |      |         | 1                                                                                                         | 2            | 3            |              |
| 1                                                                                                          | 591  | 0.06538 | 1                                                                                                         | <b>0.810</b> | 0.183        | 0.007        |
| 2                                                                                                          | 4301 | 0.47583 | 2                                                                                                         | 0.110        | <b>0.739</b> | 0.150        |
| 3                                                                                                          | 4147 | 0.45879 | 3                                                                                                         | 0.006        | 0.184        | <b>0.810</b> |

**Table S3: Class conditional probabilities of responses to the 7 comorbidities**

| Item          | Class1 | Class 2 | Class 3 |
|---------------|--------|---------|---------|
| PVD           | 0.14   | 0.04    | 0.008   |
| CVSD          | 0.15   | 0.07    | 0.002   |
| COPD          | 0.22   | 0.15    | 0.09    |
| CRF           | 0.22   | 0.02    | 0.002   |
| Heart failure | 0.21   | 0.00    | 0.002   |
| Diabetes      | 0.53   | 0.24    | 0.04    |
| Hypertension  | 0.68   | 0.67    | 0.16    |

Note: CRF, Chronic Renal failure; PVD, Peripheral Vascular Disease; COPD, Chronic Obstructive Pulmonary Disease; Cerebrovascular disease CVSD.

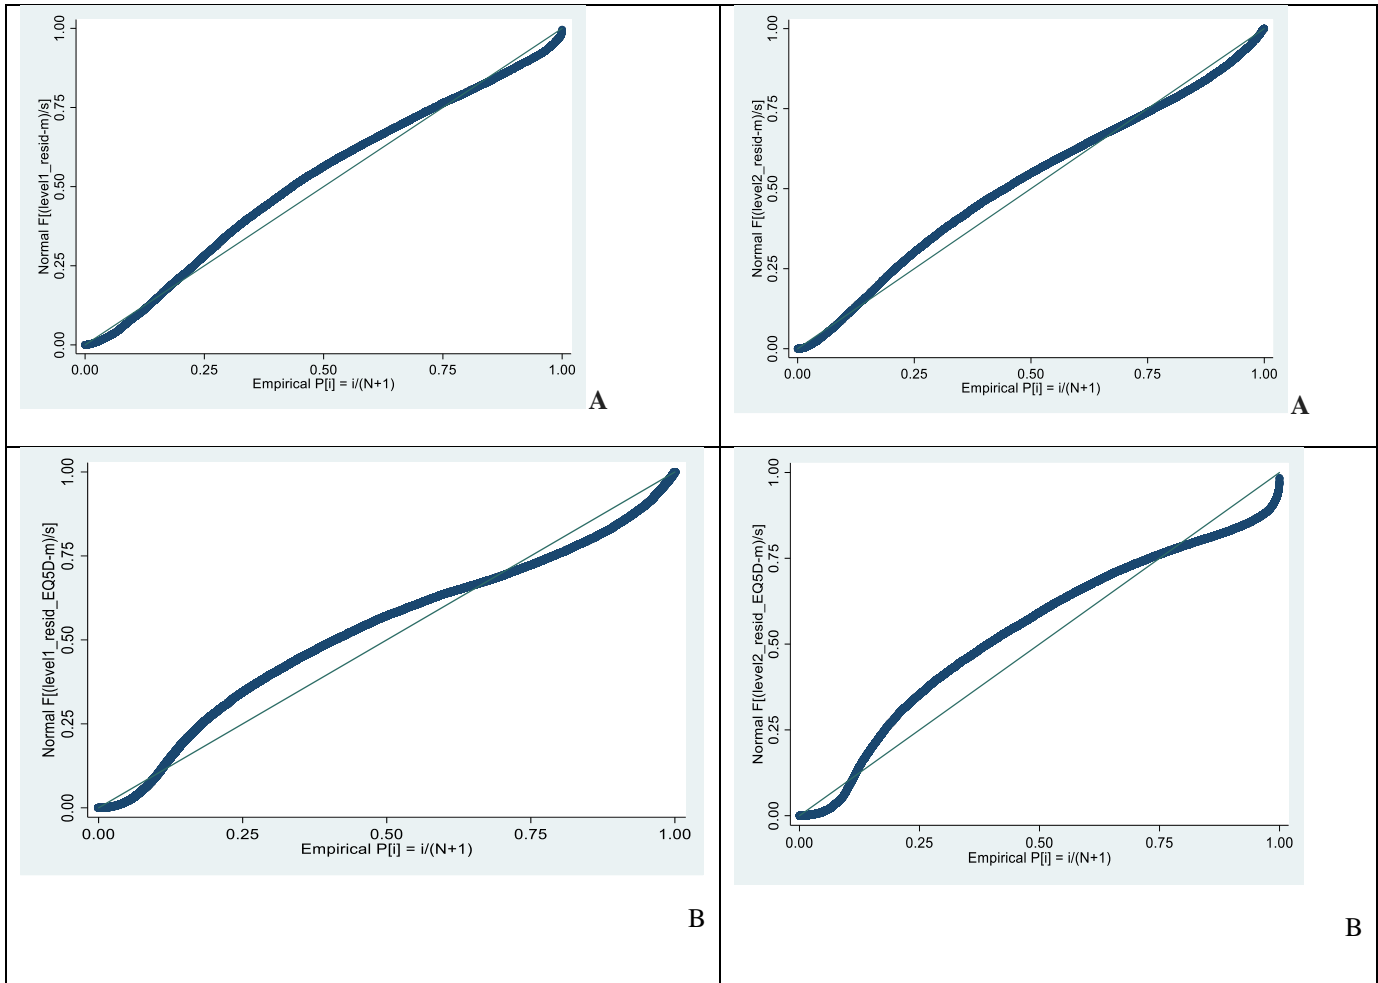

Figure S2: Normal probability plots for level 1 and level 2 residuals for (A) EQVAS and (B) EQ5D models.

**Table S4: Comparison of baseline characteristics between respondent and non-respondents at 12 months**

| <b>Variable</b>          | <b>Respondents<br/>n=5047(52.8%)</b> | <b>Non respondents<br/>n=4519(47.2%)</b> | <b>Difference<br/>(95% CI)</b> |
|--------------------------|--------------------------------------|------------------------------------------|--------------------------------|
| Female, n (%)            | 1237(24.9)                           | 1160(25.3)                               | -0.004(-0.02 to 0.01)          |
| Age, mean(SD), year      | 65.9(10.8)                           | 62.1(12.7)                               | 3.89(3.42 to 4.37)             |
| STEMI, n (%)             | 1965(39.5)                           | 1943(42.4)                               | -0.03(-0.05 to -0.01)          |
| NSTEMI, n (%)            | 3014(60.5)                           | 2644(57.6)                               | 0.03(0.01 to 0.05)             |
| White ethnicity, n (%)   | 4251(85.4)                           | 3885(84.7)                               | 0.007(-0.007 to 0.02)          |
| IMD, mean (SD)           | 21.29(14.8)                          | 25.72(16.6)                              | -4.43(-5.39 to -3.48)          |
| Previous angina, n (%)   | 938(18.8)                            | 854(18.6)                                | 0.002(-0.01 to 0.02)           |
| Diabetes, n (%)          | 749(15.0)                            | 965(21.0)                                | -0.06(-0.07 to -0.04)          |
| Hypertension, n (%)      | 2174(43.7)                           | 1904(41.5)                               | 0.02(0.002 to 0.04)            |
| Heart failure, n (%)     | 88(1.8)                              | 124(2.7)                                 | -0.01(-0.01 to -0.003)         |
| PVD, n (%)               | 150(3.0)                             | 167(3.6)                                 | -0.01(-0.01 to 0.001)          |
| CVSD, n (%)              | 202(4.1)                             | 226(4.9)                                 | -0.01(-0.02 to -0.001)         |
| CRF, n (%)               | 136(2.7)                             | 153(3.3)                                 | -0.01(-0.01 to 0.001)          |
| COPD, n (%)              | 574(11.5)                            | 592(12.9)                                | -0.01(-0.03 to -0.001)         |
| Ex/current smoker, n (%) | 3014(60.5)                           | 3234(70.5)                               | -0.1(-0.12 to -0.08)           |
| Previous AMI, n (%)      | 733(14.7)                            | 789(17.2)                                | -0.02(-0.04 to -0.01)          |
| Previous PCI, n (%)      | 434(8.7)                             | 465(10.1)                                | -0.01(-0.02 to -0.002)         |
| CABG surgery, n (%)      | 333(6.7)                             | 10(6.8)                                  | -0.001(-0.001 to 0.01)         |
| Baseline EQ-5D, mean(SD) | 0.74(0.3)                            | 0.70(0.3)                                | 0.04(0.03 to 0.06)             |
| Baseline EQ-VAS          | 64.5(20.4)                           | 62.1(21.2)                               | 2.37(1.52 to 3.22)             |

Note: IMD indicates Index of Multiple Deprivation; CABG, coronary artery bypass grafting; PCI, Percutaneous Coronary Intervention; AMI, Acute Myocardial Infarction; CRF, Chronic Renal failure; PVD, Peripheral Vascular Disease; COPD, Chronic Obstructive Pulmonary Disease; Cerebrovascular disease CVSD; Body Mass Index (BMI); ST-elevation myocardial infarction STEMI, non ST-elevation myocardial infarction NSTEMI.

**Table S5: Adjusted parameter estimates from multilevel modelling of EQ-5D scores and multimorbidity classes, regression coefficient and 95% confidence intervals**

| Variable                      | Regression coefficient (95% CI) | P value |
|-------------------------------|---------------------------------|---------|
| Intercept                     | 0.59(0.48 to 0.70)              |         |
| Month, Baseline (ref)         |                                 |         |
| 1 month                       | 0.01(0.001 to 0.01)             | 0.02    |
| 6 months                      | 0.03(0.02 to 0.04)              | <0.001* |
| 12 months                     | 0.04(0.03 to 0.05)              | <0.001* |
| <b>Multimorbidity classes</b> |                                 |         |
| Mild(ref)                     |                                 |         |
| Moderate                      | -0.05(-0.06 to -0.04)           | <0.001* |
| Severe                        | -0.16(-0.18 to -0.13)           | <0.001* |
| Diagnosis(STEMI) ref          |                                 |         |
| Diagnosis (NSTEMI)            | -0.003(-0.02 to 0.01)           | 0.65    |
| Age                           | 0.001(0.001 to 0.002)           | <0.001* |
| Women                         | -0.07(-0.08 to -0.06)           | <0.001* |
| Ethnicity white               | 0.05(0.01 to 0.08)              | 0.01    |
| Ex/current smoking status     | -0.03(-0.04 to -0.02)           | <0.001* |
| <b>Treatments</b>             |                                 |         |
| Previous PCI                  | -0.03 (-0.05 to -0.02)          | <0.001* |
| Previous CABG surgery         | -0.03 (-0.06 to -0.01)          | 0.003*  |

Adjusting for age, sex, ethnicity (white versus other) smoking status (never vs ex or current), angina, diagnosis (STEMI or NSTEMI), revascularisation (percutaneous coronary intervention [PCI] vs. no PCI; coronary artery bypass graft [CABG] surgery vs no CABG surgery), medications (B-Blockers, statins, ACE, Aspirin), cardiac rehabilitation (yes/no). Note: CABG, coronary artery bypass grafting; PCI, Percutaneous Coronary Intervention; MI, Myocardial Infarction, ST-elevation myocardial infarction STEMI, non ST-elevation myocardial infarction NSTEMI. \*Significant after Hochberg correction using a false discovery rate of 0.05
